# Supplementary material
Source: PubMed Central journal article supplement (PMC4260627)

Supplementary Figure 1

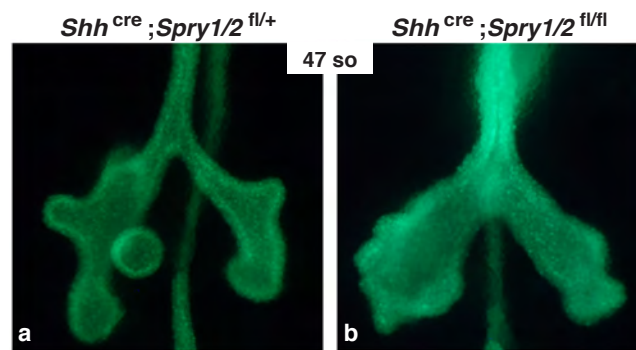

Supplementary Figure 2

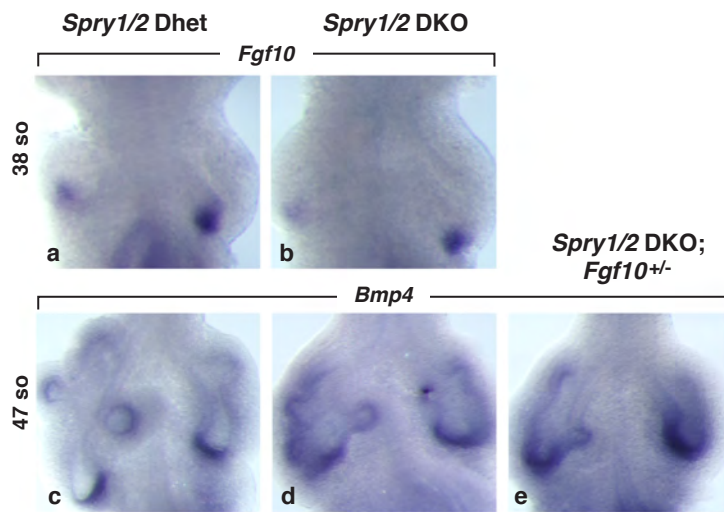

Supplementary Figure 3

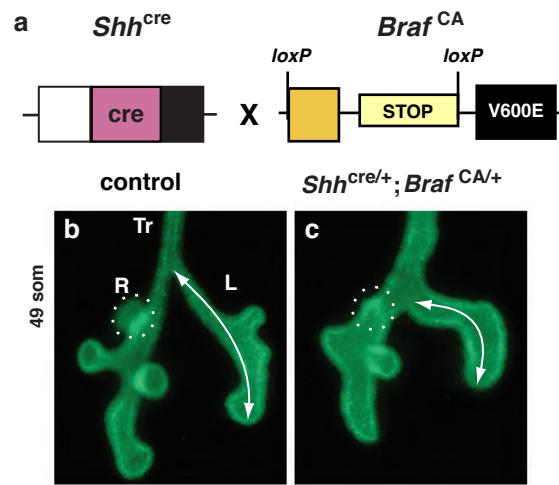

Supplementary Figure 4

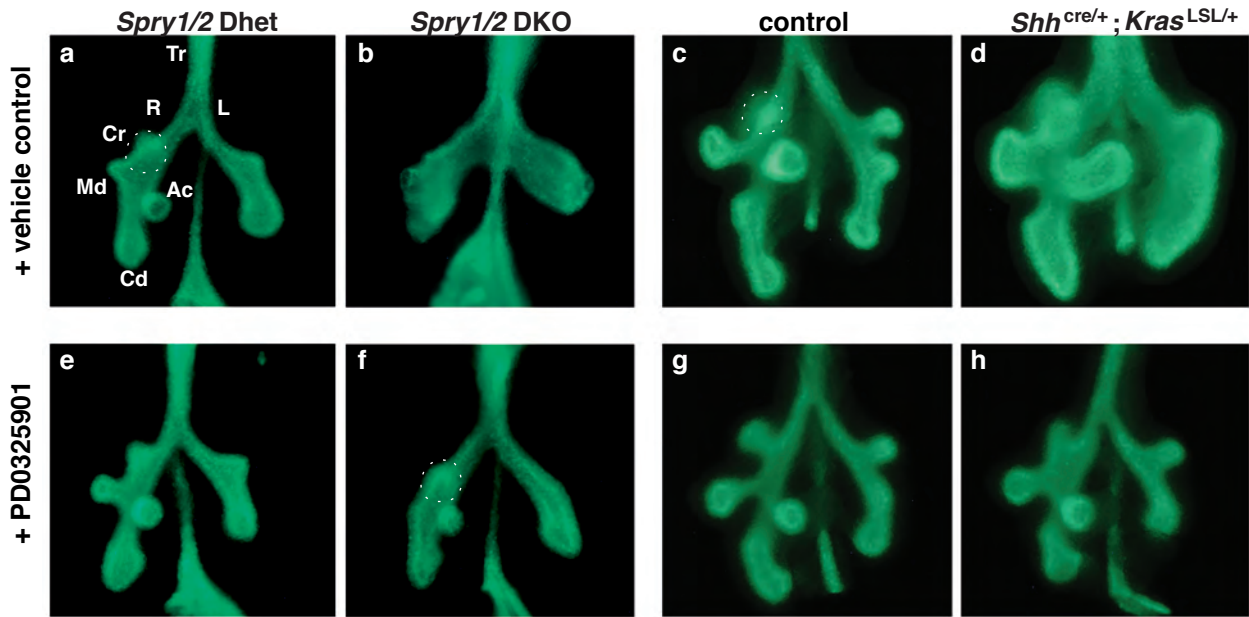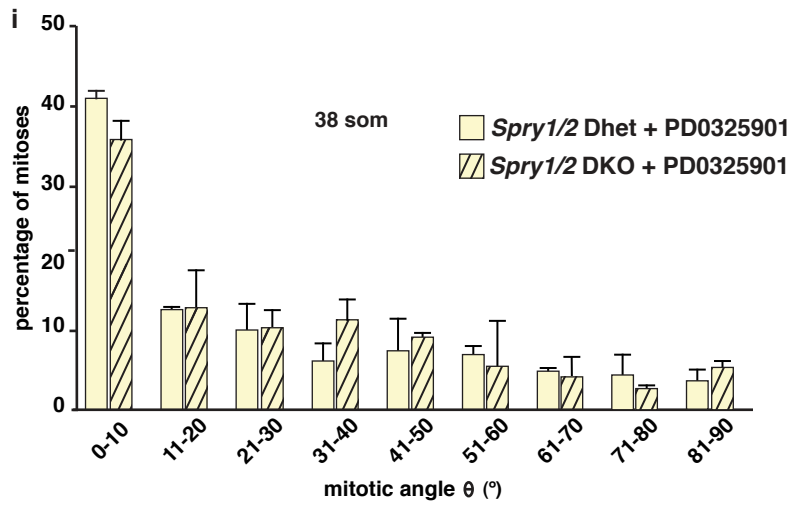

Supplementary Figure 5

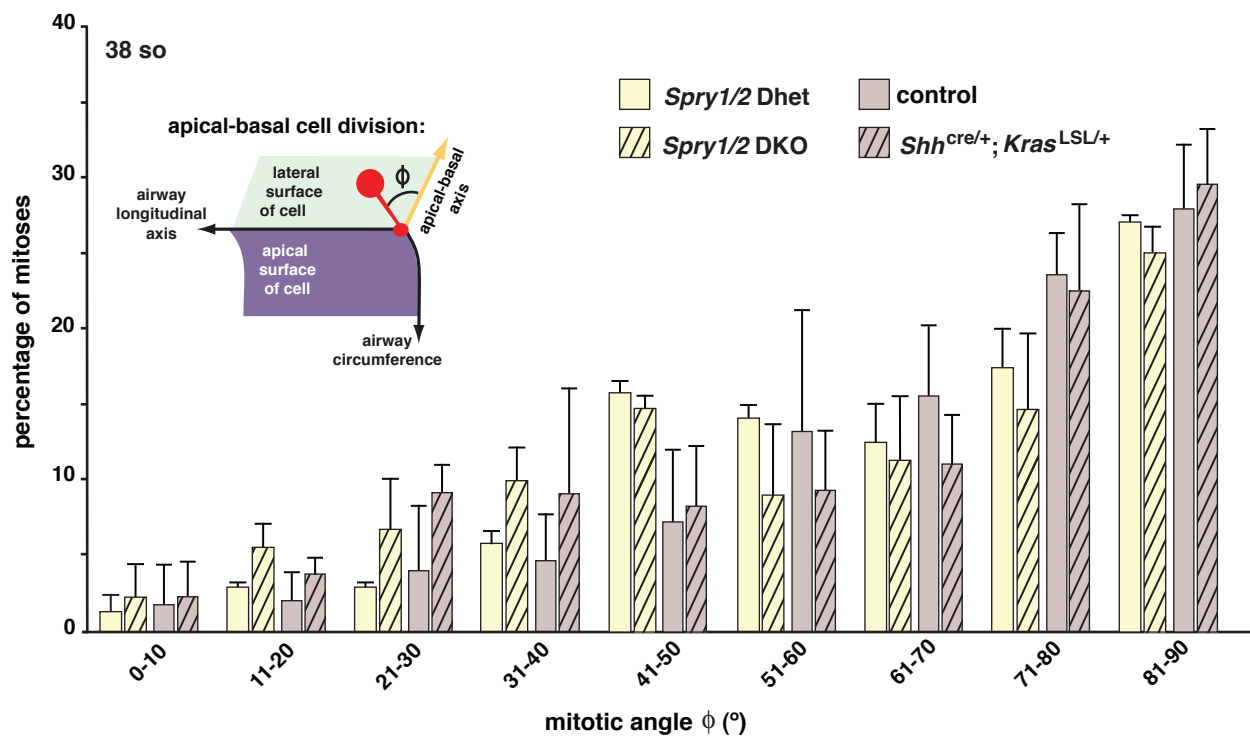

Supplementary Figure 6

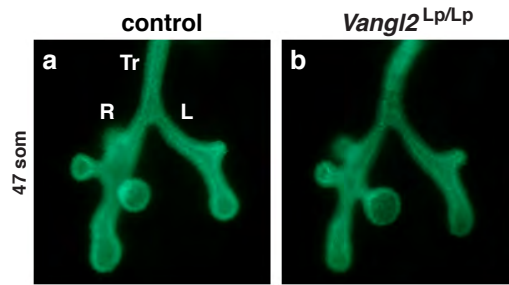

Supplement: NIHMS646149-supplement-Supplementary_Data.pdf [file NIHMS646149-supplement-Supplementary_Data.pdf]
